# Supplementary material for: Topotactic transformation of metal–organic frameworks to iron-based catalysts for the direct hydrogenation of CO2 to olefins
Source: Royal Society of Chemistry journal article supplement (doi:10.1039/d3cy00147d), 2023-01-01
Supplement: d3cy00147d1.pdf [file d3cy00147d1.pdf]

## **Topotactic Transformation of Metal–Organic Frameworks to Iron-based Catalysts for the Direct Hydrogenation of CO<sub>2</sub> to Olefins**

Qingqing Yang<sup>a,b</sup>, Ruifeng Wang<sup>b</sup>, Xiong Zhang<sup>b</sup>, Shifu Wang<sup>b</sup>, Qi Yu<sup>\*a</sup>, Xiong Su<sup>\*b</sup>,  
Xuning Li<sup>\*b</sup>, and Yanqiang Huang<sup>b</sup>

<sup>a</sup> School of Materials Science and Engineering, and Shaanxi Laboratory of Catalysis, Shaanxi University of Technology, Hanzhong 723001, China

<sup>b</sup> State Key Laboratory of Catalysis, Dalian Institute of Chemical Physics, Chinese Academy of Sciences, Dalian 116023, P.R. China

Corresponding author:

[qiyu@snut.edu.cn](mailto:qiyu@snut.edu.cn) (Q. Yu); [suxiong@dicp.ac.cn](mailto:suxiong@dicp.ac.cn) (X. Su); [lixn@dicp.ac.cn](mailto:lixn@dicp.ac.cn) (X. Li)

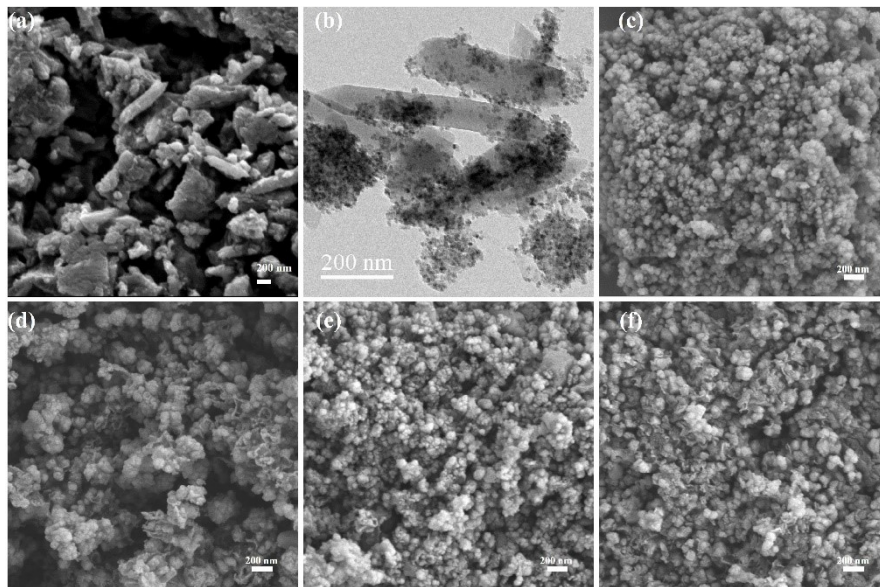

Figure S1 The (a) SEM and (b) TEM images of Fe-MIL-88; and the SEM images of (c) Fe/C, (d) NiFe/C, (e) ZnFe/C and (f) MnFe/C.

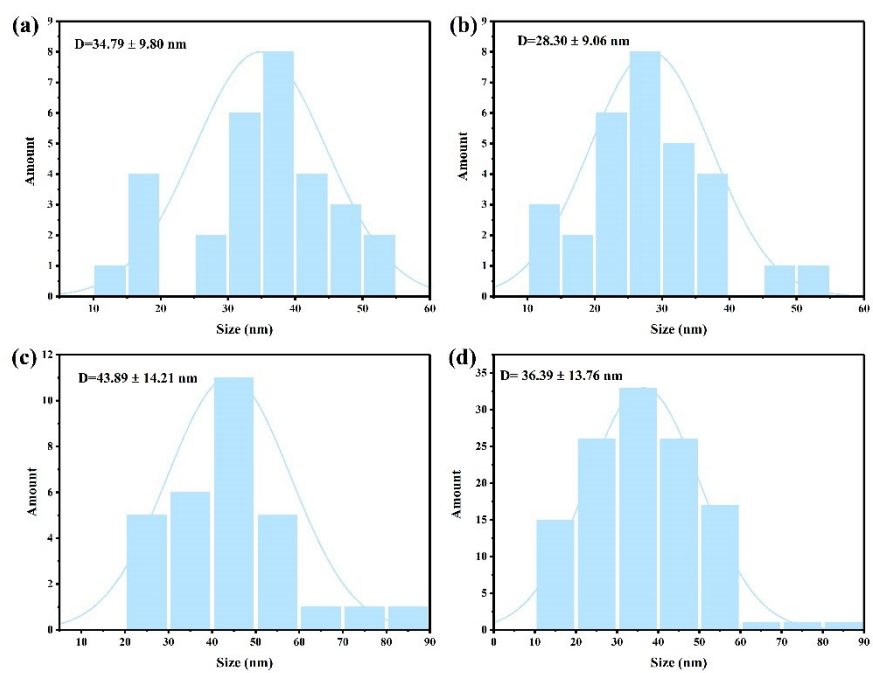

Figure S2 Particle distribution of the fresh MFe/C catalysts. (a) Fe/C, (b) NiFe/C, (c) ZnFe/C and (d) MnFe/C.

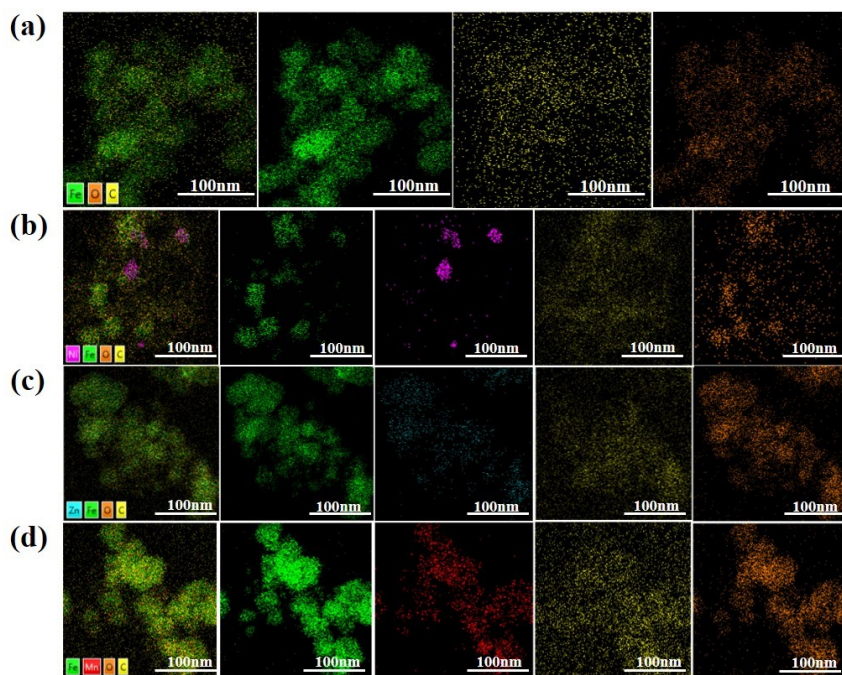

Figure S3 The EDS elemental mapping of the fresh MFe/C catalysts. (a) Fe/C, (b) NiFe/C, (c) ZnFe/C and (d) MnFe/C.

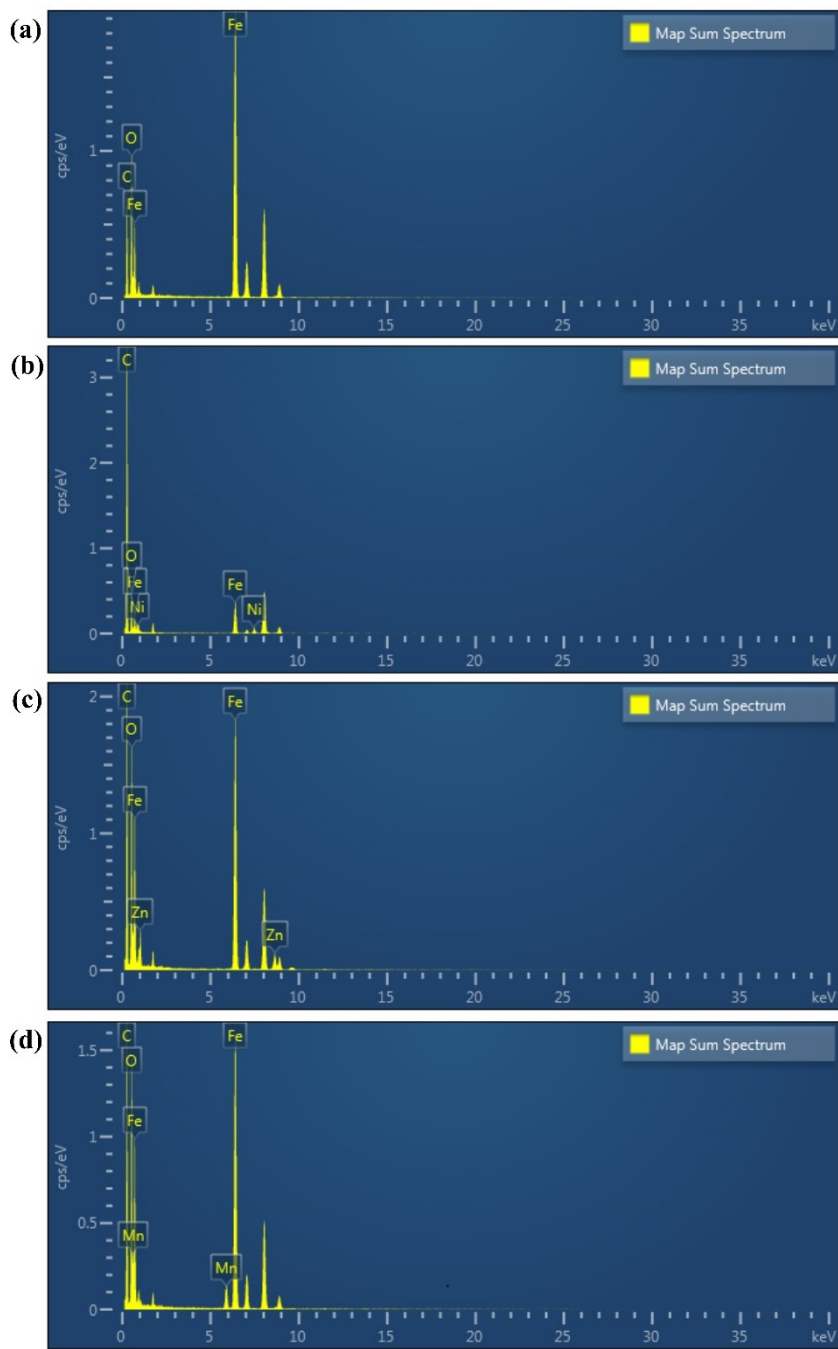

Figure S4 The EDS of the fresh MFe/C catalysts. (a) Fe/C, (b) NiFe/C, (c) ZnFe/C and (d) MnFe/C.

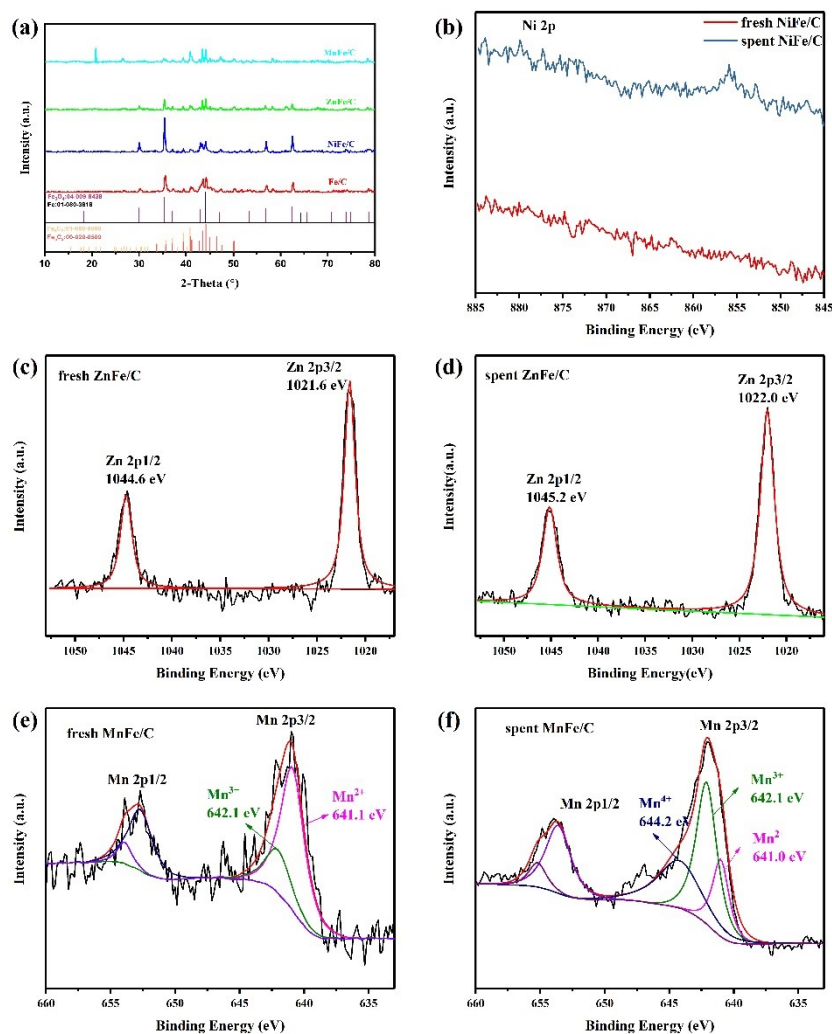

Figure S5 The physical and chemical properties of the MFe/C catalysts: (a) XRD patterns of spent MFe/C catalysts; (b) Ni 2p XPS spectra of fresh and spent NiFe/C; Zn 2p XPS spectra of (c) fresh and (d) spent ZnFe/C; Mn 2p XPS spectra of (e) fresh and (f) spent MnFe/C.

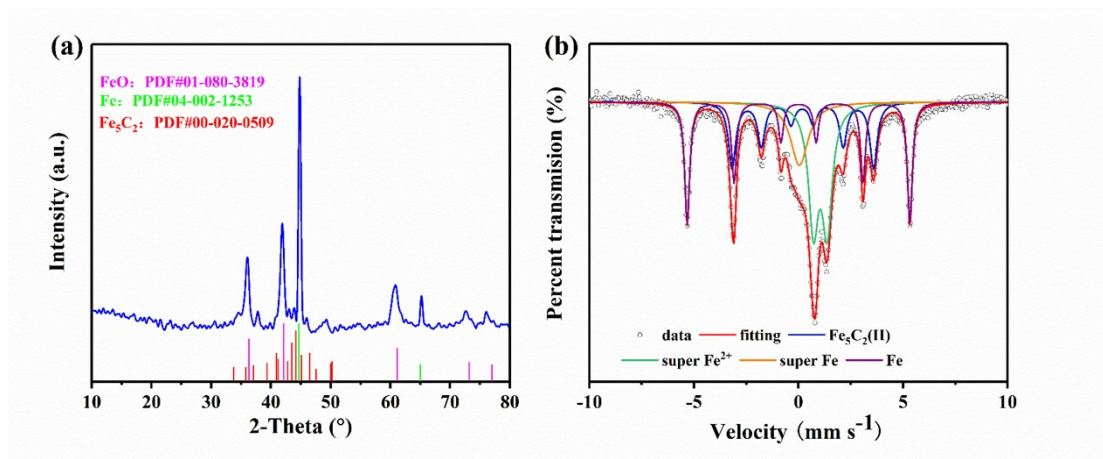

Figure S6 The XRD patterns (a) and Mössbauer spectra (b) of MnFe/C catalysts after H<sub>2</sub> reduction.

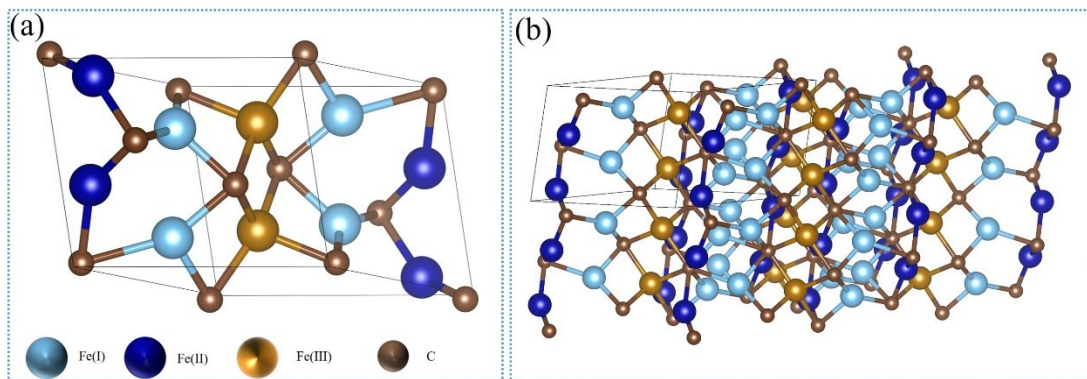

Figure S7 Unit cell structure of Fe at different sites in  $\text{Fe}_5\text{C}_2$ : The cell crystal structure (a) and 3x3x3 crystal structure (b) of  $\text{Fe}_5\text{C}_2$ .



Table S1 Textural properties of the MFe/C catalysts.

| <b>Samples</b> | <b>Fe Contents (wt%)</b> | <b>M<sup>2+</sup>contents (wt%)</b> | <b>Fe/M ratio</b> | <b>Crystalline size (nm)<sup>a</sup></b> |
|----------------|--------------------------|-------------------------------------|-------------------|------------------------------------------|
| Fe/C           | 54.5                     | -                                   | -                 | 23.8                                     |
| ZnFe/C         | 45.8                     | 4.5                                 | 10.2              | 15.7                                     |
| NiFe/C         | 48.7                     | 5.8                                 | 8.4               | 21.4                                     |
| MnFe/C         | 53.8                     | 4.9                                 | 11.0              | 11.5                                     |

<sup>a</sup> The average crystalline sizes of Fe<sub>3</sub>O<sub>4</sub> in MFe/C catalysts calculated by Scherrer equation.

Table S2 Properties of iron-based catalysts by EDS.

| <b>Sample</b> | <b>Fe Contents (wt%)</b> | <b>M<sup>2+</sup>contents (wt%)</b> |
|---------------|--------------------------|-------------------------------------|
| Fe/C          | 62.7                     | -                                   |
| NiFe/C        | 10.2                     | 1.8                                 |
| ZnFe/C        | 38.2                     | 2.9                                 |
| MnFe/C        | 40.1                     | 3.2                                 |

Table S3 Detailed Mössbauer parameters of the fresh catalysts.

| Samples | Assignment                            | IS<br>(mm s <sup>-1</sup> ) | QS<br>(mm s <sup>-1</sup> ) | Line<br>Width | Hhf<br>(kOe) | Relative<br>Abundance<br>(%) |
|---------|---------------------------------------|-----------------------------|-----------------------------|---------------|--------------|------------------------------|
| Fe/C    | Fe <sub>3</sub> O <sub>4</sub> (A)    | 0.28                        | -0.01                       | 0.41          | 489          | 51.1                         |
|         | Fe <sub>3</sub> O <sub>4</sub> (B)    | 0.58                        | 0.00                        | 0.66          | 454          | 48.9                         |
| MnFe/C  | Fe <sub>2</sub> O <sub>3</sub>        | 0.35                        | 0.13                        | 0.58          | 432          | 12.4                         |
|         | Fe <sub>5</sub> C <sub>2</sub> (II)   | 0.19                        | 0.03                        | 0.43          | 209          | 32.9                         |
|         | Fe <sup>2+</sup> (super) <sup>a</sup> | 1.04                        | 0.62                        | 0.58          | -            | 29.6                         |
|         | Fe(super) <sup>a</sup>                | -0.00                       | 0.00                        | 0.90          | -            | 11.9                         |
|         | Fe                                    | -0.02                       | -                           | 0.58          | 329          | 13.3                         |
|         | Fe <sub>5</sub> C <sub>2</sub> (II)   | 0.20                        | 0.02                        | 0.88          | 200          | 61.8                         |
| ZnFe/C  | Fe <sup>2+</sup> (super) <sup>a</sup> | 1.08                        | 0.53                        | 0.52          | -            | 16.6                         |
|         | Fe <sup>3+</sup> (super) <sup>a</sup> | 0.28                        | 0.77                        | 0.86          | -            | 21.6                         |
| NiFe/C  | Fe <sub>3</sub> O <sub>4</sub> (A)    | 0.29                        | -0.01                       | 0.32          | 491          | 42.9                         |
|         | Fe <sub>3</sub> O <sub>4</sub> (B)    | 0.64                        | 0.00                        | 0.52          | 459          | 57.1                         |

<sup>a</sup>superparamagnetic

Table S4 Comparison of the CO<sub>2</sub> hydrogenation performance of the MnFe/C catalyst in this work with the previously reported Fe-based catalysts.

| <b>Samples</b>                           | <b>P</b><br>(MPa) | <b>T</b><br>(°C) | <b>GHSV</b><br>(mL h <sup>-1</sup><br>gcat <sup>-1</sup> ) | <b>CO<sub>2</sub></b><br>Con. ( %) | <b>S<sub>C5+</sub></b> | <b>STY</b><br>(mol <sub>C5+</sub> g <sub>cat</sub> <sup>-1</sup> h <sup>-1</sup> ) | <b>Ref.</b>          |
|------------------------------------------|-------------------|------------------|------------------------------------------------------------|------------------------------------|------------------------|------------------------------------------------------------------------------------|----------------------|
| N-600-0                                  | 3                 | 400              | 3600                                                       | 46.0                               | 22.2                   | 0.05                                                                               | 1                    |
| N-K-600-0                                | 3                 | 400              | 3600                                                       | 43.1                               | 15.4                   | 0.03                                                                               |                      |
| 5Mn-Na/Fe                                | 3                 | 320              | 2040                                                       | 38.6                               | 42.1                   | 0.05                                                                               | 2                    |
| FeK/MPC                                  | 2.5               | 350              | 2000                                                       | 52.4                               | 33.2                   | 0.05                                                                               | 3                    |
| 0%Mn                                     | -                 | 290              | 20000                                                      | 33.78                              | 20.2<br>8              | 0.22                                                                               | 4                    |
| Fe-K                                     | 1.5               | 320              | 10000                                                      | 35.1                               | 21.9                   | 0.11                                                                               | 5                    |
| ZnFe <sub>2</sub> Ox                     | 1.0               | 300              | 2400                                                       | 34.6                               | 20.4                   | 0.02                                                                               | 6                    |
| 10Fe3Cu1K/Al <sub>2</sub> O <sub>3</sub> | 3                 | 400              | 33600                                                      | 41.7                               | 13.8                   | 0.27                                                                               | 7                    |
| FeZnNa/MWNTs                             | 2                 | 320              | 9000                                                       | 36.5                               | 37.2                   | 0.17                                                                               | 8                    |
| FeK3/SWNTs                               | 2                 | 340              | 9000                                                       | 53                                 | 56                     | 0.38                                                                               | 9                    |
| Na-Zn-Fe                                 | 2.5               | 340              | 15000                                                      | 39                                 | 40.5                   | 0.34                                                                               | 10                   |
| <b>MnFe/C</b>                            | <b>2</b>          | <b>400</b>       | <b>12000</b>                                               | <b>37.60</b>                       | <b>57.9</b>            | <b>0.27</b>                                                                        | <b>This<br/>work</b> |

Table S5 Surface composition of the various catalysts calculated by XPS.

| <b>Element</b> | <b>fresh</b> |               |               |               | <b>spent</b> |               |               |               |
|----------------|--------------|---------------|---------------|---------------|--------------|---------------|---------------|---------------|
|                | <b>Fe/C</b>  | <b>NiFe/C</b> | <b>MnFe/C</b> | <b>ZnFe/C</b> | <b>Fe/C</b>  | <b>NiFe/C</b> | <b>MnFe/C</b> | <b>ZnFe/C</b> |
| Fe             | 4.52         | -             | 4.02          | 2.68          | 3.66         | 1.53          | 2.25          | 4.54          |
| Na             | 1.56         | 0.77          | -             | 4.86          | 3.27         | 2.94          | 3.14          | 3.44          |
| O              | 21.21        | 11.46         | 19.98         | 23.33         | 16.79        | 13.59         | 14.7          | 17.19         |
| C              | 72.71        | 84.74         | 75.99         | 69.13         | 76.27        | 81.94         | 79.91         | 70.55         |

Table S6 Detailed Mössbauer parameters of the spent catalysts.

| Samples | Assignment                           | IS<br>(mm s <sup>-1</sup> ) | QS<br>(mm s <sup>-1</sup> ) | Line<br>Width | Hhf<br>(kOe) | Relative<br>Abundance<br>(%) |
|---------|--------------------------------------|-----------------------------|-----------------------------|---------------|--------------|------------------------------|
| Fe/C    | Fe <sub>3</sub> O <sub>4</sub> (A)   | 0.28                        | 0.00                        | 0.24          | 487          | 10.4                         |
|         | Fe <sub>3</sub> O <sub>4</sub> (B)   | 0.67                        | 0.00                        | 0.45          | 457          | 23.7                         |
|         | Fe <sub>5</sub> C <sub>2</sub> (I)   | 0.20                        | 0.00                        | 0.38          | 184          | 23.5                         |
|         | Fe <sub>5</sub> C <sub>2</sub> (II)  | 0.26                        | 0.12                        | 0.32          | 215          | 23.1                         |
|         | Fe <sub>5</sub> C <sub>2</sub> (III) | 0.18                        | 0.01                        | 0.54          | 109          | 19.3                         |
| MnFe/C  | Fe <sub>5</sub> C <sub>2</sub> (I)   | 0.22                        | -0.04                       | 0.38          | 186          | 34.4                         |
|         | Fe <sub>5</sub> C <sub>2</sub> (II)  | 0.24                        | 0.11                        | 0.32          | 216          | 33.1                         |
|         | Fe <sub>5</sub> C <sub>2</sub> (III) | 0.13                        | 0.00                        | 0.61          | 106          | 32.5                         |
| ZnFe/C  | Fe <sub>3</sub> O <sub>4</sub> (A)   | 0.28                        | 0.05                        | 0.34          | 485          | 4.7                          |
|         | Fe <sub>3</sub> O <sub>4</sub> (B)   | 0.67                        | -0.08                       | 0.52          | 446          | 8.0                          |
|         | Fe <sub>5</sub> C <sub>2</sub> (I)   | 0.16                        | 0.09                        | 0.40          | 185          | 30.4                         |
|         | Fe <sub>5</sub> C <sub>2</sub> (II)  | 0.25                        | 0.11                        | 0.32          | 215          | 27.2                         |
|         | Fe <sub>5</sub> C <sub>2</sub> (III) | 0.22                        | 0.11                        | 0.30          | 110          | 16.5                         |
|         | super                                | 0.39                        | 0.77                        | 0.58          | -            | 13.2                         |
| NiFe/C  | Fe <sub>3</sub> O <sub>4</sub> (A)   | 0.28                        | 0.00                        | 0.28          | 488          | 20.4                         |
|         | Fe <sub>3</sub> O <sub>4</sub> (B)   | 0.66                        | -0.01                       | 0.35          | 459          | 28.6                         |
|         | Fe <sub>5</sub> C <sub>2</sub> (I)   | 0.21                        | -0.03                       | 0.56          | 182          | 23.8                         |
|         | Fe <sub>5</sub> C <sub>2</sub> (II)  | 0.25                        | 0.12                        | 0.33          | 210          | 10.5                         |
|         | Fe <sub>5</sub> C <sub>2</sub> (III) | 0.18                        | -0.12                       | 0.45          | 105          | 11.2                         |
|         | super                                | 0.21                        | 0.94                        | 0.39          | -            | 5.5                          |

<sup>a</sup>superparamagnetic

Table S7 Detailed Mössbauer parameters of MnFe/C catalysts after H<sub>2</sub> reduction.

| <b>Samples</b> | <b>Assignment</b>                     | <b>IS<br/>(mm s<sup>-1</sup>)</b> | <b>QS<br/>(mm s<sup>-1</sup>)</b> | <b>Line<br/>Width</b> | <b>Hhf<br/>(kOe)</b> | <b>Relative<br/>Abundance<br/>(%)</b> |
|----------------|---------------------------------------|-----------------------------------|-----------------------------------|-----------------------|----------------------|---------------------------------------|
| MnFe/C         | Fe <sub>5</sub> C <sub>2</sub> (II)   | 0.19                              | 0.03                              | 0.42                  | 210                  | 24.3                                  |
|                | Fe <sup>2+</sup> (super) <sup>a</sup> | 1.04                              | 0.65                              | 0.58                  | -                    | 31.0                                  |
|                | Fe(super) <sup>a</sup>                | 0.04                              | -8.46                             | 1.02                  | -                    | 14.2                                  |
|                | Fe                                    | 0.00                              | -                                 | 0.28                  | 331                  | 30.4                                  |

Table S8 Summary of olefin selectivity and O/P and Fe<sub>5</sub>C<sub>2</sub> content of different catalysts in CO<sub>2</sub> hydrogenation reactions

| References | Samples      | Olefins selectivity | O/P  | Fe <sub>5</sub> C <sub>2</sub> (II) | Fe <sub>5</sub> C <sub>2</sub> (II) |
|------------|--------------|---------------------|------|-------------------------------------|-------------------------------------|
| 11         | 0Na/Fe       | 6.0                 | 0.2  | 3.0                                 | 1.4                                 |
|            | 0.01Na/Fe    | 11.8                | 0.3  | 3.7                                 | 1.9                                 |
|            | 0.05Na/Fe    | 39.4                | 1.3  | 6.0                                 | 3.1                                 |
|            | 0.1Na/Fe     | 56.8                | 3.1  | 10.0                                | 4.7                                 |
|            | 0.5Na/Fe     | 64.3                | 5.3  | 10.4                                | 6.8                                 |
|            | 1.0Na/Fe     | 64.1                | 5.3  | 11.3                                | 5.0                                 |
|            | 3.0Na/Fe     | 64.1                | 5.4  | 10.3                                | 4.4                                 |
|            | 5.0Na/Fe     | 63.6                | 5.3  | 9.9                                 | 5.3                                 |
| 2          | 1Na/Fe       | 23.4                | 11.0 | 11.3                                | 5.0                                 |
|            | 0.1Mn–Na/Fe  | 24.1                | 9.5  | 10.7                                | 6.5                                 |
|            | 1Mn–Na/Fe    | 25.1                | 8.2  | 12.7                                | 7.3                                 |
|            | 5Mn–Na/Fe    | 30.2                | 7.5  | 28.4                                | 17.6                                |
|            | 10Mn–Na/Fe   | 29.2                | 6    | 14.9                                | 7.8                                 |
| 8          | FeZnNa/MWNTs | 67.1                | 5.99 | 26.2                                | 13.4                                |
|            | FeZnK/MWNTs  | 66.8                | 6.42 | 22.8                                | 19.0                                |
|            | FeZnRb/MWNTs | 62.7                | 5.35 | 18.1                                | 16.8                                |
| 9          | Fe/SWNTs     | 5.4                 | 0.6  | 14.6                                | 2.7                                 |
|            | FeK1/SWNTs   | 12                  | 0.8  | 17.6                                | 8.7                                 |
|            | FeK3/SWNTs   | 23                  | 0.6  | 20.1                                | 9.7                                 |
|            | FeK5/SWNTs   | 25                  | 1.6  | 22.4                                | 10.8                                |
|            | FeK7/SWNTs   | 27                  | 1.8  | 20.2                                | 5.3                                 |
| 10         | Fe           | 5.9                 | 0.13 | 1.5                                 | 0.6                                 |
|            | Zn-Fe        | 5.3                 | 0.11 | 1.4                                 | 0.1                                 |
|            | Na-Fe        | 79                  | 9.9  | 24                                  | 13                                  |
|            | Na-Zn-Fe     | 80                  | 9.8  | 34                                  | 25                                  |



## References

1. J. Liu, A. Zhang, M. Liu, S. Hu, F. Ding, C. Song and X. Guo, *J. CO<sub>2</sub> Util.*, 2017, **21**, 100-107.
2. B. Liang, T. Sun, J. Ma, H. Duan, L. Li, X. Yang, Y. Zhang, X. Su, Y. Huang and T. Zhang, *Catal. Sci. Technol.*, 2019, **9**, 456-464.
3. S.-M. Hwang, C. Zhang, S. J. Han, H.-G. Park, Y. T. Kim, S. Yang, K.-W. Jun and S. K. Kim, *J. CO<sub>2</sub> Util.*, 2020, **37**, 65-73.
4. Z. Zhang, C. Wei, L. Jia, Y. Liu, C. Sun, P. Wang and W. Tu, *J. Catal.*, 2020, **390**, 12-22.
5. J. Huang, S. Jiang, M. Wang, X. Wang, J. Gao and C. Song, *ACS Sustainable Chem. Eng.*, 2021, **9**, 7891-7903.
6. L. Guo, J. Li, Y. Zeng, R. Kosol, Y. Cui, N. Kodama, X. Guo, R. Prasert, V. Tharapong, G. Liu, J. Wu, G. Yang, Y. Yoneyama and N. Tsubaki, *Fuel*, 2020, **276**.
7. J. Liu, A. Zhang, X. Jiang, M. Liu, Y. Sun, C. Song and X. Guo, *ACS Sustainable Chem. Eng.*, 2018, **6**, 10182-10190.
8. H. Singh Malhi, Z. Zhang, Y. Shi, X. Gao, W. Liu, W. Tu and Y.-F. Han, *Fuel*, 2023, **339**, 127267-127277.
9. S. Wang, Y. Ji, X. Liu, S. Yan, S. Xie, Y. Pei, H. Li, M. Qiao and B. Zong, *ChemCatChem*, 2022, **14**, e202101535-202101545.
10. Z. Zhang, G. Huang, X. Tang, H. Yin, J. Kang, Q. Zhang and Y. Wang, *Fuel*, 2022, **309**, 122105-122117.
11. B. Liang, H. Duan, T. Sun, J. Ma, X. Liu, J. Xu, X. Su, Y. Huang and T. Zhang, *ACS Sustainable Chem. Eng.*, 2018, **7**, 925-932.
