# Supplementary figures and images for: Topotactic transformation of metal–organic frameworks to iron-based catalysts for the direct hydrogenation of CO2 to olefins
Source: Royal Society of Chemistry journal article supplement (doi:10.1039/d3cy00147d), 2023-01-01

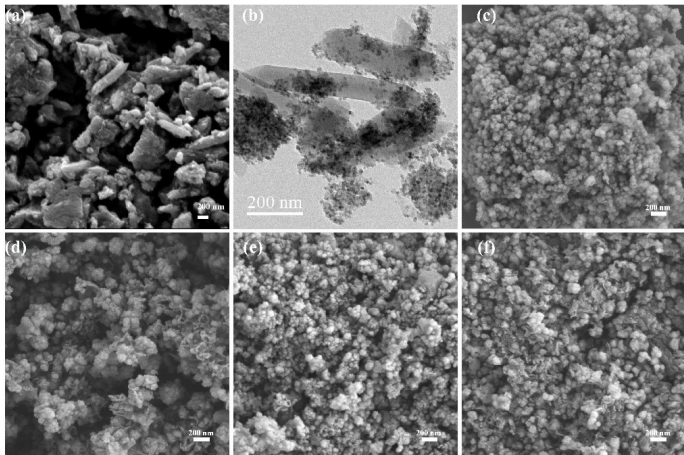

Supplement: d3cy00147d3.pdf [file d3cy00147d3.pdf]

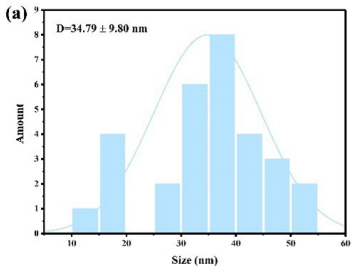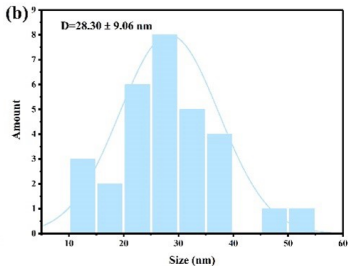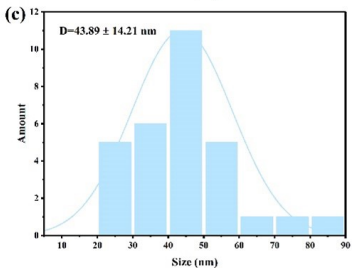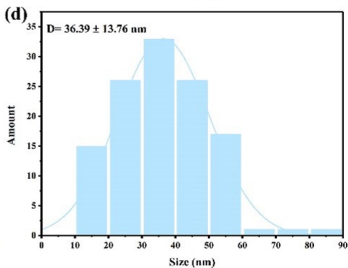

Supplement: d3cy00147d4.pdf [file d3cy00147d4.pdf]

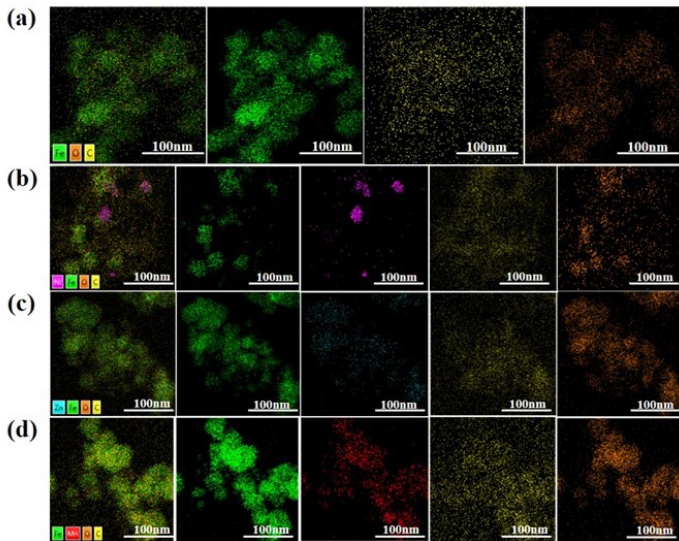

Supplement: d3cy00147d5.pdf [file d3cy00147d5.pdf]

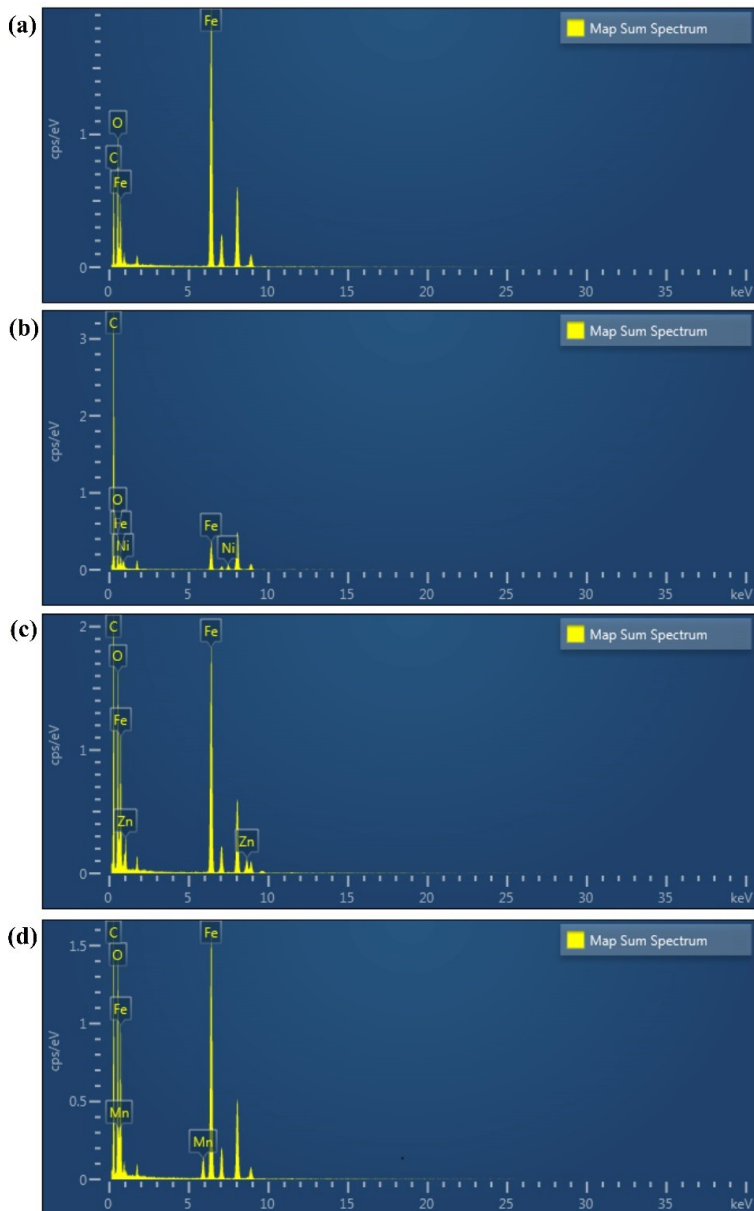

Supplement: d3cy00147d6.pdf [file d3cy00147d6.pdf]

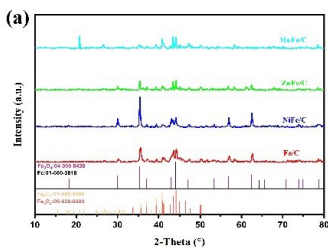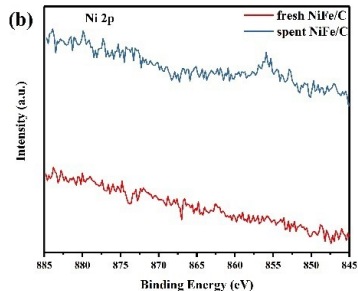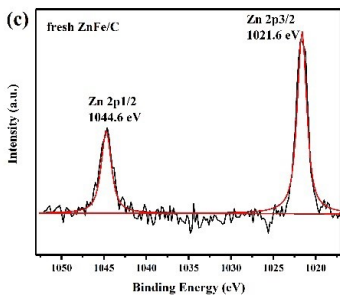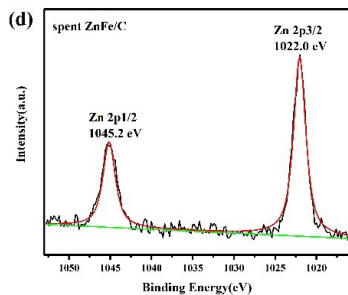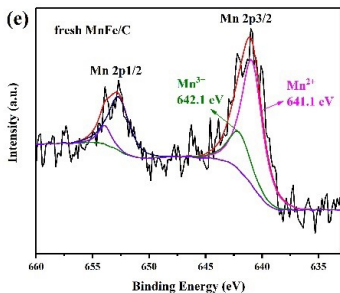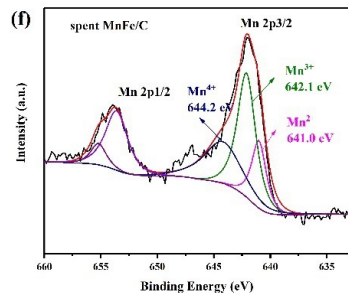

Supplement: d3cy00147d7.pdf [file d3cy00147d7.pdf]

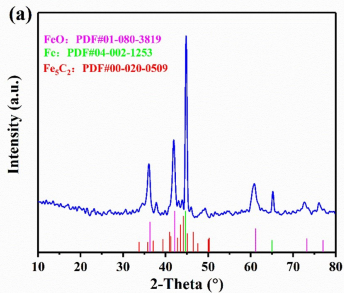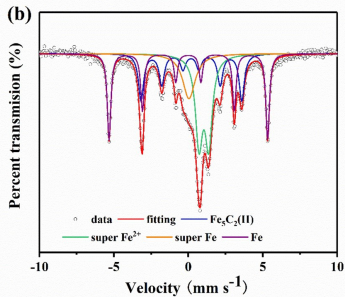

Supplement: d3cy00147d8.pdf [file d3cy00147d8.pdf]

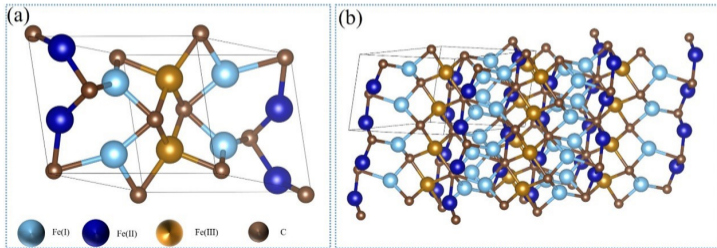

Supplement: d3cy00147d9.pdf [file d3cy00147d9.pdf]
